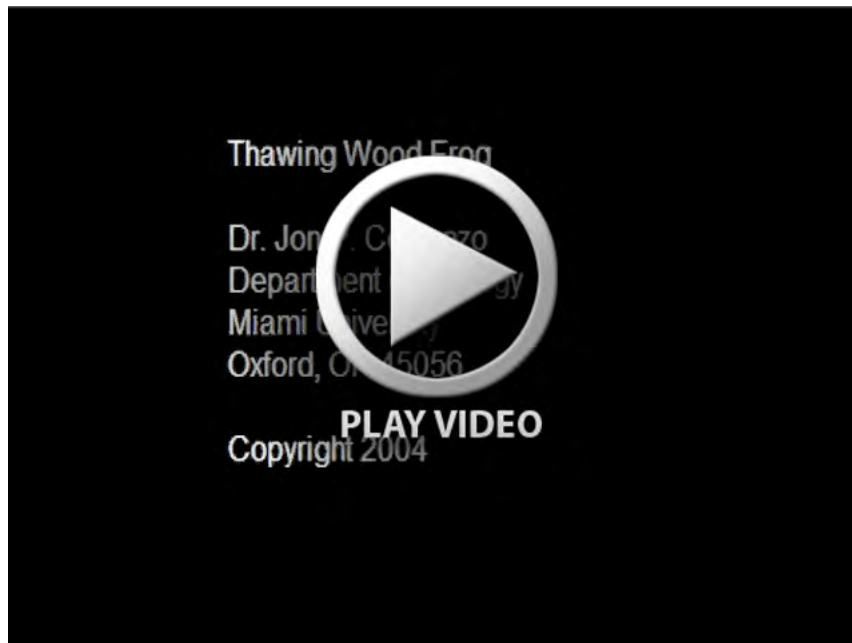

**Movie 1.** Time-lapse video of a wood frog (*Rana sylvatica*) thawing at 4°C following an experimental freezing exposure to -2°C for 24 h.
